# Supplementary material
Source: MDPI journal article supplement (https://www.mdpi.com/2073-4344/12/10/1175)
Supplement: s1 [file s1 › catalysts-1894524-supplementary.pdf]

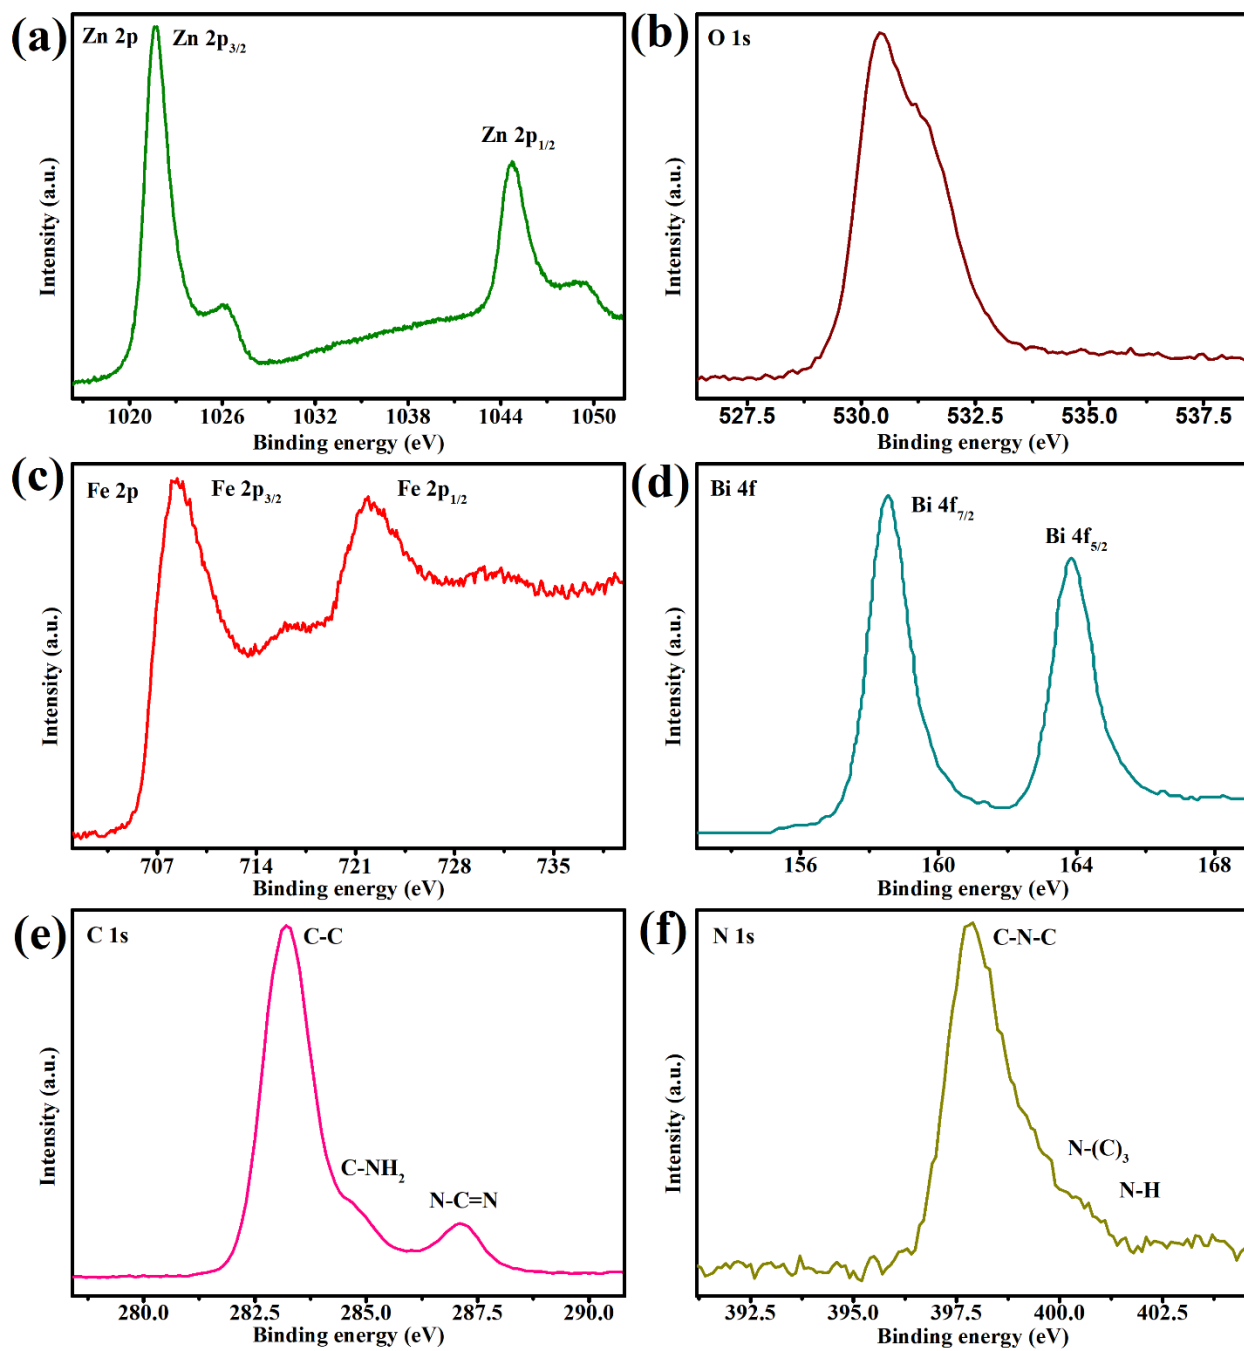

**Figure S1.** High-resolution XPS spectra of BZFG NCs; (a) Zn 2p, (b) O 1s, (c) Fe 2p, (d) Bi 4f, (e) C 1s and (f) N 1s.

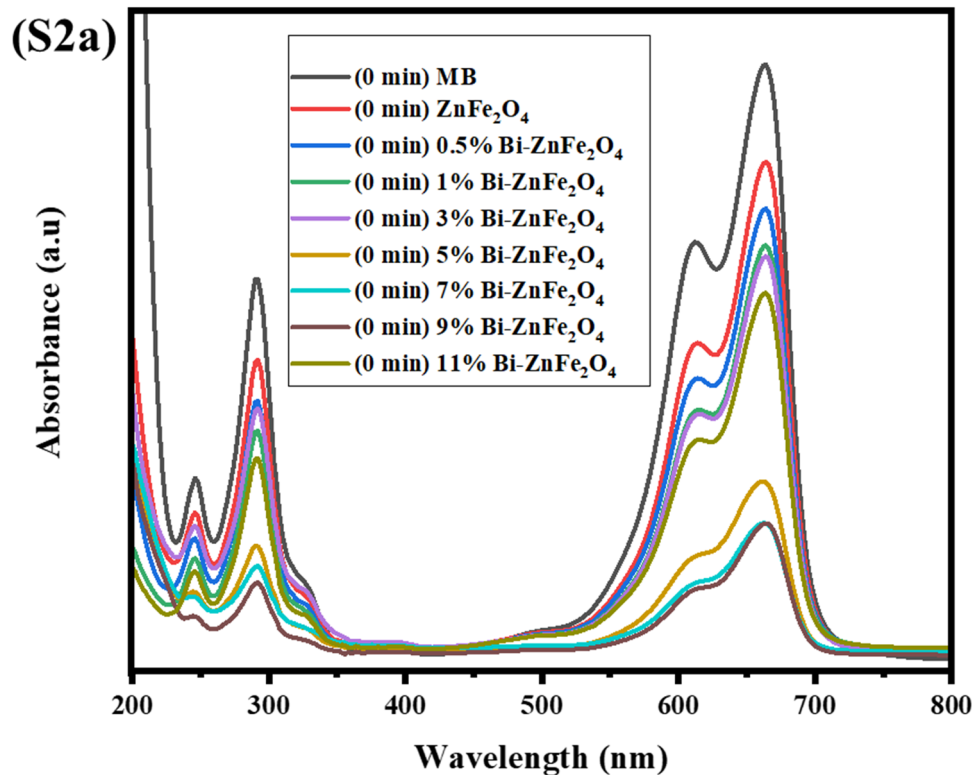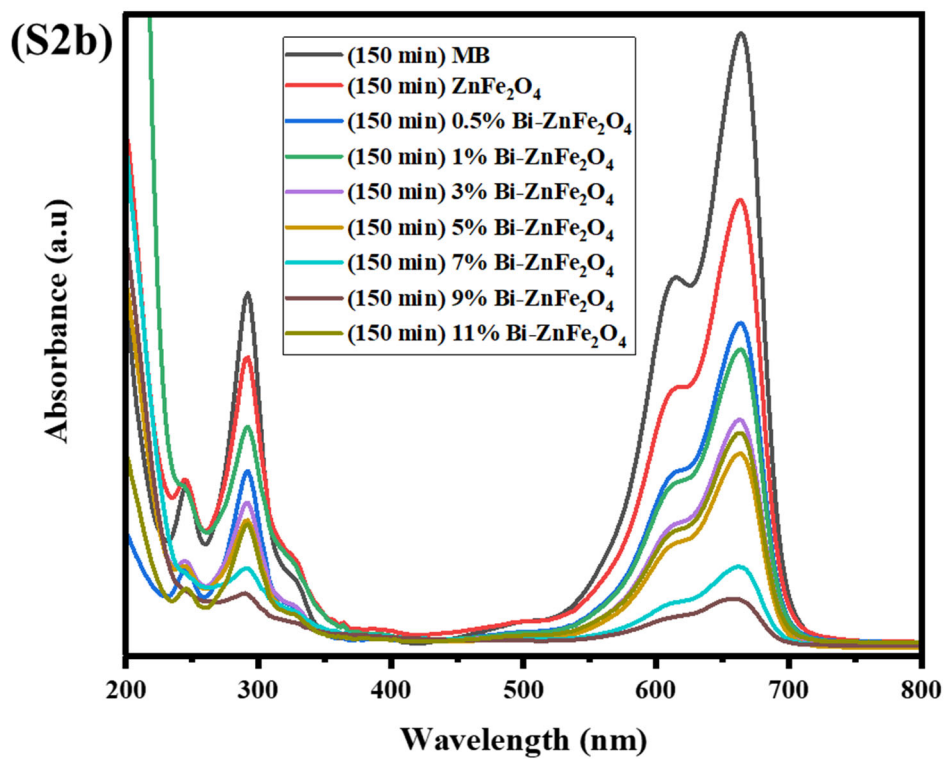

**Figure S2.** Photodegradation of MB by Bi- $\text{ZnFe}_2\text{O}_4$  NPs at 0 minutes (a) and after 150 minutes (b) of sunlight irradiation (Degradation contours).

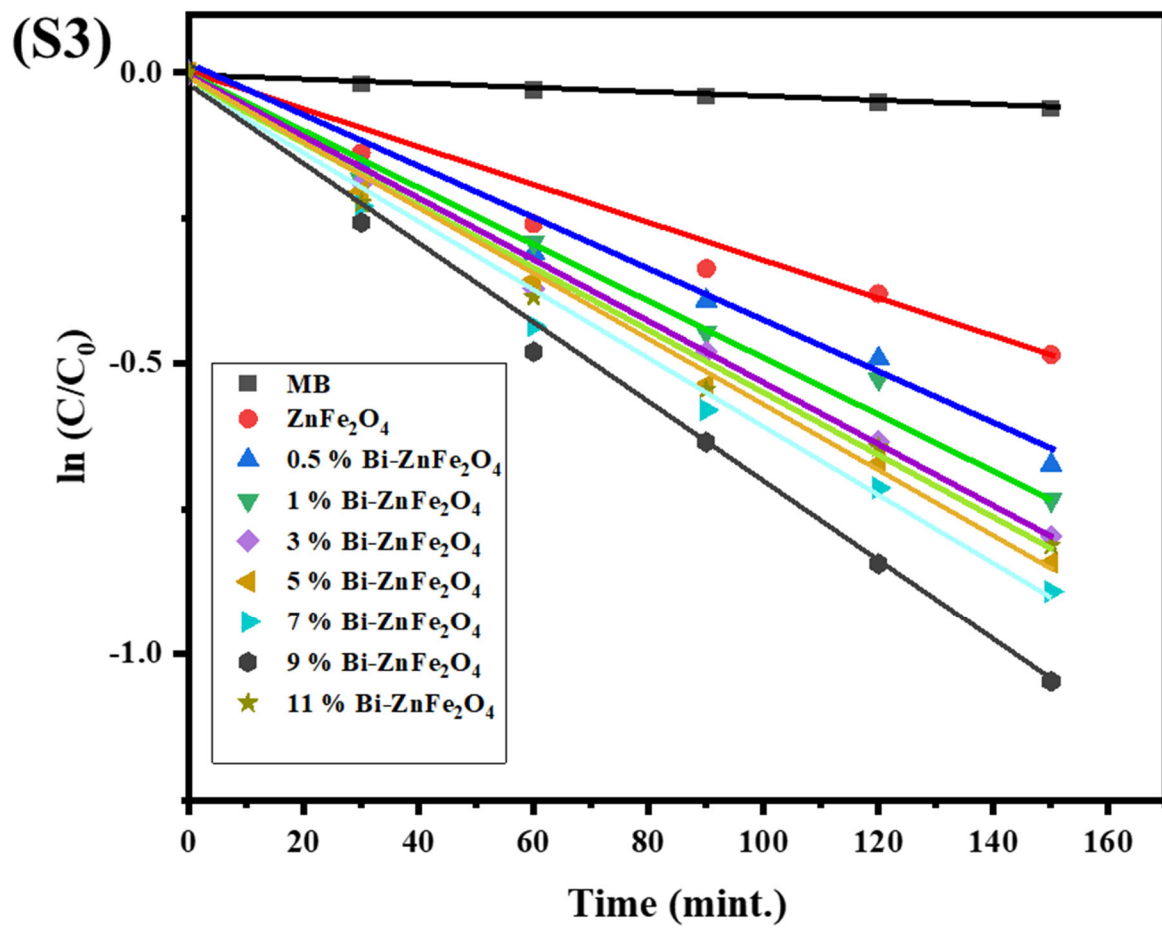

**Figure S3.** First-order kinetics plot of S-g-C<sub>3</sub>N<sub>4</sub>, Bi-ZnFe<sub>2</sub>O<sub>4</sub> Ns, Bi-ZnFe<sub>2</sub>O<sub>4</sub>/S-g-C<sub>3</sub>N<sub>4</sub> NCs.

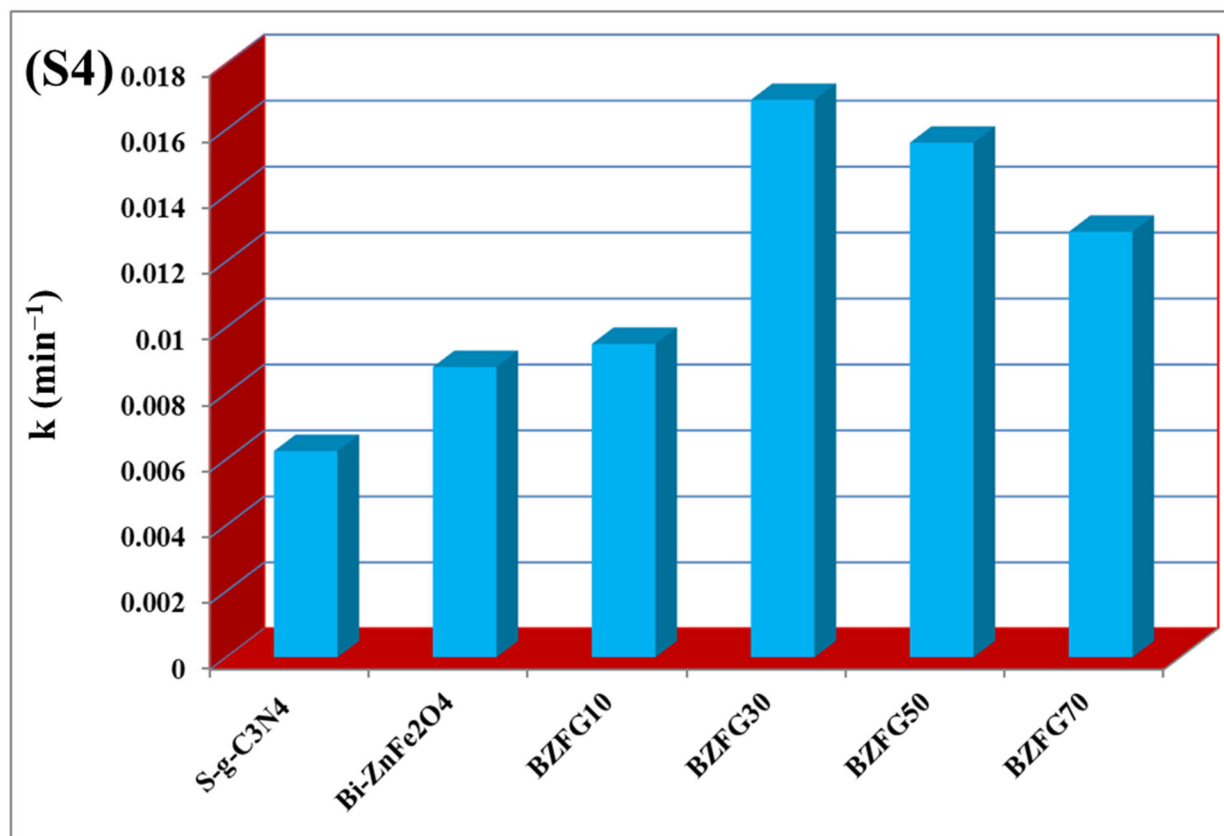

**Figure S4.** Photodegradation rate constant  $k$  ( $\text{min}^{-1}$ ) of Methylene Blue by S-g-C<sub>3</sub>N<sub>4</sub>, Bi-ZnFe<sub>2</sub>O<sub>4</sub> NPs, Bi-ZnFe<sub>2</sub>O<sub>4</sub>/S-g-C<sub>3</sub>N<sub>4</sub> NCs.
